# Supplementary material for: Investigations of Thermal, Mechanical, and Gas Barrier Properties of PA11-SiO2 Nanocomposites for Flexible Riser Application
Source: MDPI journal article supplement (doi:10.3390/polym14204260), 2022-10-11
Supplement: s1 [file s1]

Supporting File

# Investigations of Thermal, Mechanical, and Gas Barrier Properties of PA11-SiO<sub>2</sub> Nanocomposites for Flexible Riser Application

Jihong Wen <sup>1</sup>, Dong Huang <sup>1</sup>, Yan Li <sup>2</sup>, Xichong Yu <sup>2</sup>, Xinpeng Zhang <sup>1</sup>, Xiaoyu Meng <sup>1</sup>,  
Chuanbo Cong <sup>1</sup>, and Qiong Zhou <sup>1,\*</sup>

<sup>1</sup> New Energy and Material college, China University of Petroleum-Beijing, Beijing, 102249, China

<sup>2</sup> Key Laboratory of Deepwater Engineering, CNOOC Research Institute Co., Ltd. No. 6 Taiyanggong South Street, Beijing, 100027, China

\* Correspondence: zhouqiong@cup.edu.cn

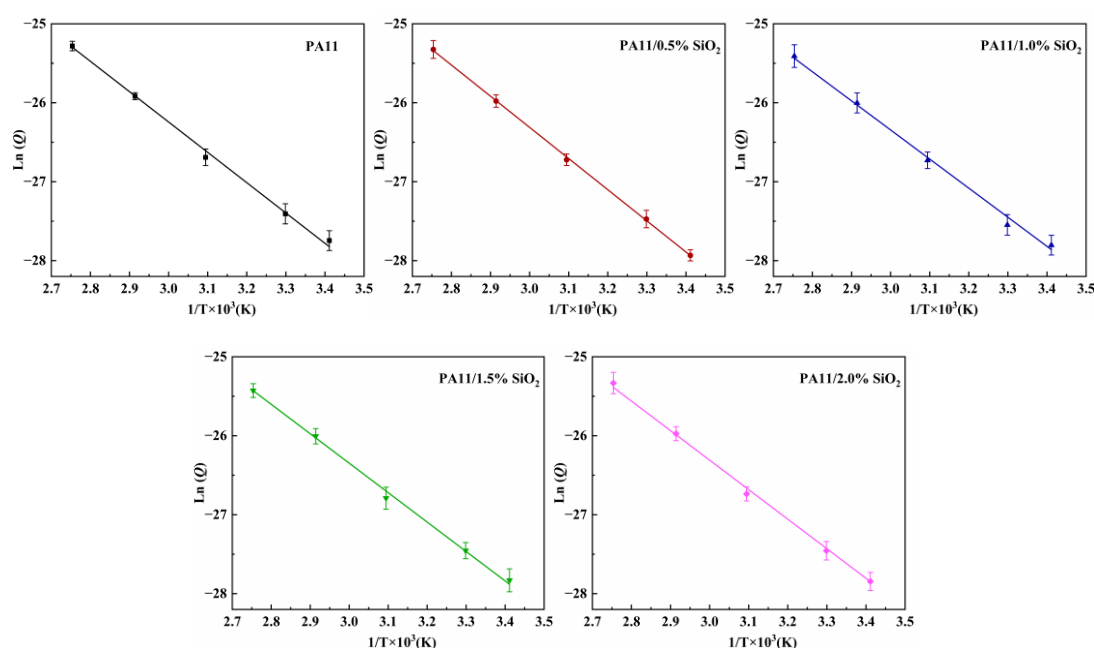

**Figure S1** Temperature influence on transport coefficients of CO<sub>2</sub> in PA11/SiO<sub>2</sub> composite, Permeability versus reciprocal temperature

**Table S1** Intercept and slope of permeability - temperature fitting curve

| Samples   | PA11     | PA11/0.5%SiO <sub>2</sub> | PA11/1.0%SiO <sub>2</sub> | PA11/1.5%SiO <sub>2</sub> | PA11/2.0%SiO <sub>2</sub> |
|-----------|----------|---------------------------|---------------------------|---------------------------|---------------------------|
| Intercept | -14.72   | -14.47                    | -15.29                    | -15.16                    | -15.09                    |
| Slope     | -3841.74 | -3946.74                  | -3684.95                  | -3727.81                  | -3738.94                  |

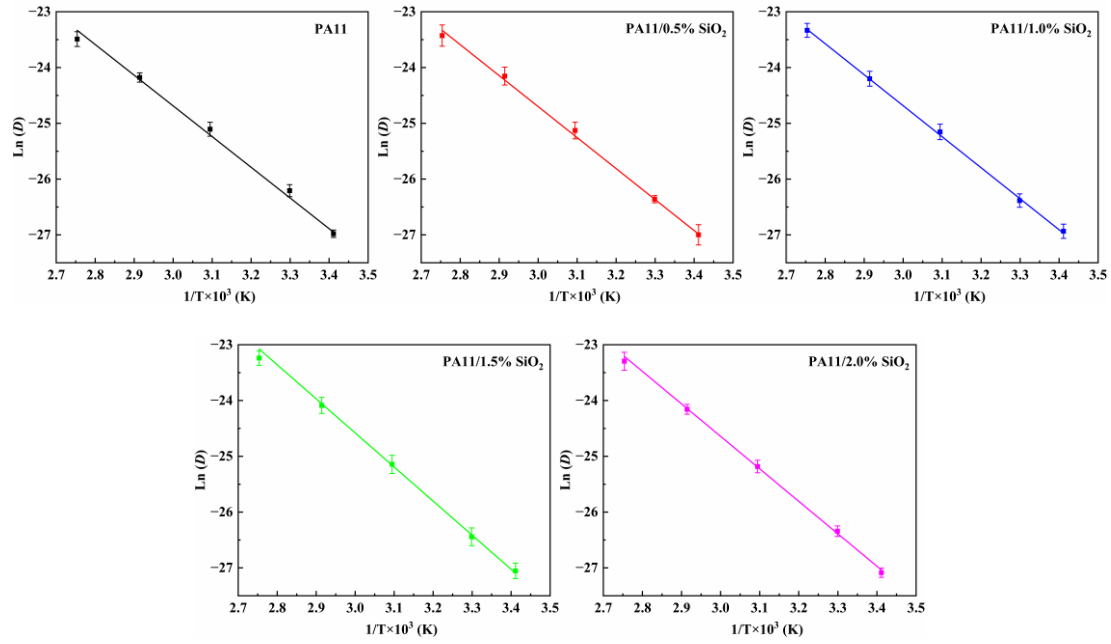

**Figure S2** Temperature influence on transport coefficients of CO<sub>2</sub> in PA11/SiO<sub>2</sub> composite, Diffusion versus reciprocal temperature

**Table S2** Intercept and slope of Diffusion - temperature fitting curve

| Samples   | PA11     | PA11/0.5%SiO <sub>2</sub> | PA11/1.0%SiO <sub>2</sub> | PA11/1.5%SiO <sub>2</sub> | PA11/2.0%SiO <sub>2</sub> |
|-----------|----------|---------------------------|---------------------------|---------------------------|---------------------------|
| Intercept | -8.18    | -8.04                     | -8.01                     | -6.25                     | -7.18                     |
| Slope     | -5501.86 | -5553.82                  | -5559.28                  | -6109.72                  | -5821.6                   |

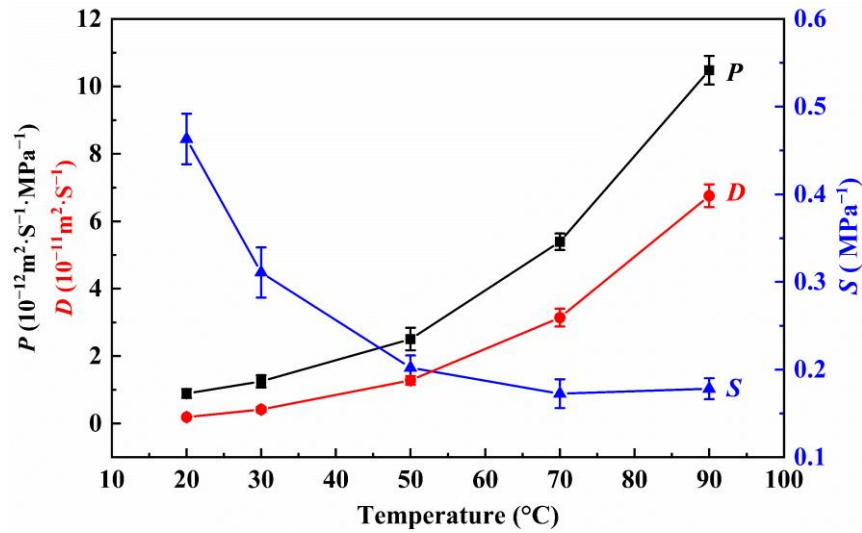

**Figure S3** Permeability coefficient, diffusion coefficient, and solubility of CO<sub>2</sub> in PA11 vary with temperature

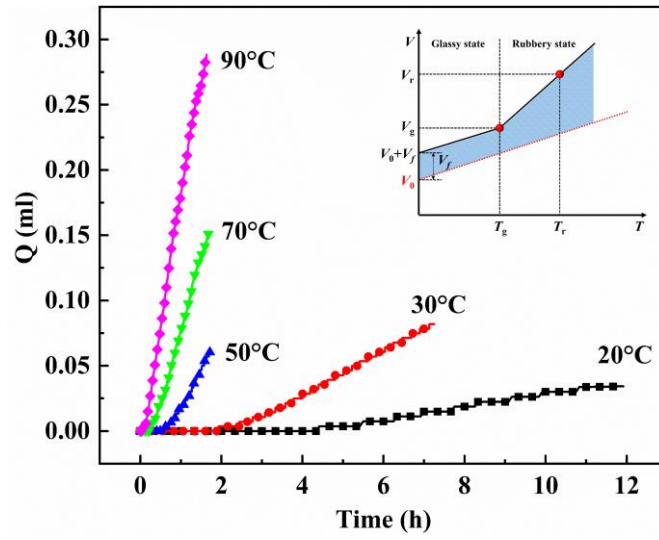

$V_0$ -Occupied volume,  $V_g$ -The total volume in  $T_g$  temperature,

$V_f$ -The free volume below  $T_g$  temperature,  $V_r$ -The volume at a temperature higher than  $T_g$

**Figure S4** Permeation curve of PA11 at 20°C, 30°C, 50°C, 70°C, and 90°C, diagram of free volume with temperature
